# Supplementary material for: Phase–amplitude coupling and the BOLD signal: A simultaneous intracranial EEG (icEEG) - fMRI study in humans performing a finger-tapping task
Source: PubMed Central journal article supplement (PMC5312786; doi:10.1016/j.neuroimage.2016.08.036), 2017-02-01

**Patient 1**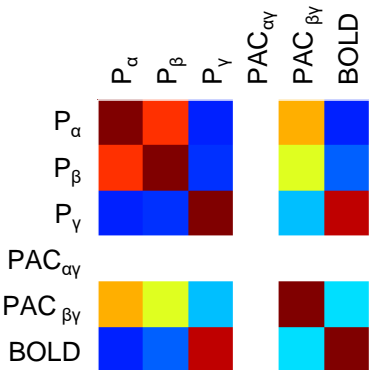**Patient 2**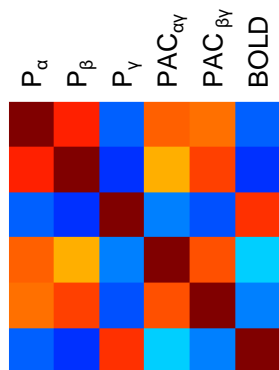**Patient 3**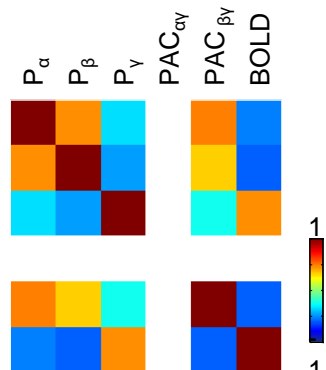

Supplement: mmc1.pdf [file mmc1.pdf]
