# Supplementary material for: Phase–amplitude coupling and the BOLD signal: A simultaneous intracranial EEG (icEEG) - fMRI study in humans performing a finger-tapping task
Source: PubMed Central journal article supplement (PMC5312786; doi:10.1016/j.neuroimage.2016.08.036), 2017-02-01

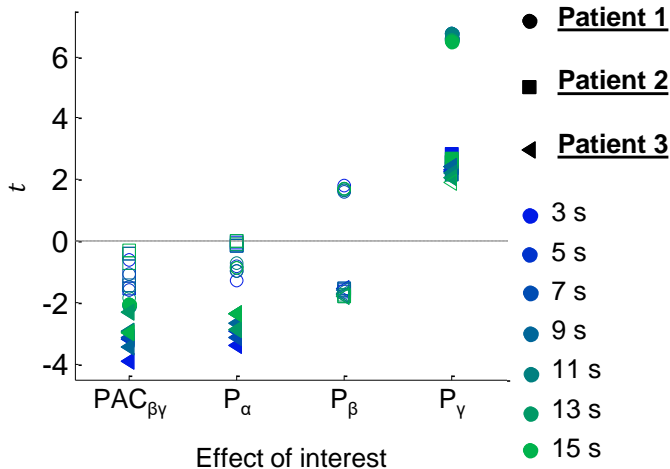

Supplement: mmc2.pdf [file mmc2.pdf]
